# Supplementary material for: Healthcare-Associated COVID-19 across Five Pandemic Waves: Prediction Models and Genomic Analyses
Source: MDPI journal article supplement (doi:10.3390/v14102292), 2022-10-18
Supplement: s1 [file s1]

## Supplementary Table S2

Demographic, clinical and laboratory data of symptomatic healthcare-associated versus community-associated hospitalised COVID-19 patients (UZ Brussel, 2020-22): univariate analysis

| Patient demographics                               |         | Healthcare-associated (N = 165) % | Community-associated (N = 159) % | p-value  |
|----------------------------------------------------|---------|-----------------------------------|----------------------------------|----------|
| Gender                                             |         |                                   |                                  | 0.658    |
|                                                    | Male    | 83 50.3                           | 84 52.8                          |          |
|                                                    | Female  | 82 49.7                           | 75 47.2                          |          |
| Age (years)                                        |         | 74.0 (63.5 - 82.0)                | 67.0 (53.0 - 80.0)               | 0.0012   |
| Smoking                                            | Never   | 62 52.1                           | 71 61.2                          | 0.321    |
|                                                    | Former  | 39 32.8                           | 33 28.4                          |          |
|                                                    | Current | 18 15.1                           | 12 10.3                          |          |
| BMI (kg / m <sup>2</sup> )                         |         | 24.7 (22.09 - 29.7)               | 27.3 (24.2 - 31.6)               | 0.0004   |
| Frailty                                            |         |                                   |                                  | < 0.0001 |
|                                                    | 1       | 2 1.4                             | 21 14.2                          |          |
|                                                    | 2       | 6 4.2                             | 28 18.9                          |          |
|                                                    | 3       | 21 14.8                           | 39 26.4                          |          |
|                                                    | 4       | 28 19.7                           | 27 18.2                          |          |
|                                                    | 5       | 44 31.0                           | 11 7.4                           |          |
|                                                    | 6       | 21 14.8                           | 11 7.4                           |          |
|                                                    | 7       | 17 12.0                           | 8 5.4                            |          |
|                                                    | 8       | 3 2.1                             | 1 0.7                            |          |
|                                                    | 9       | 0 0.0                             | 2 1.4                            |          |
| <b>Hospitalization</b>                             |         |                                   |                                  |          |
| ICU admission during stay                          |         | 45 28.0                           | 34 21.4                          | 0.196    |
| Deceased                                           |         | 44 27.3                           | 20 12.6                          | 0.0012   |
| Stay from COVID-19 diagnosis (days)                |         | 12.5 (7.0 - 21.8)                 | 8.0 (5.0 - 12.0)                 | < 0.0001 |
| <b>Symptoms at COVID-19 diagnosis</b>              |         |                                   |                                  |          |
| Fever                                              |         | 81 54.0                           | 90 59.6                          | 0.353    |
| Chills                                             |         | 22 37.9                           | 36 62.1                          | 0.169    |
| Cough                                              |         | 81 59.6                           | 108 73.0                         | 0.0174   |
| Shortness of breath                                |         | 66 47.1                           | 111 74.5                         | < 0.0001 |
| Tachypnoea                                         |         | 59 40.4                           | 88 59.5                          | 0.0016   |
| Headache                                           |         | 10 9.3                            | 36 29.5                          | 0.0001   |
| Sore throat                                        |         | 11 11.3                           | 11 10.0                          | 0.823    |
| Coryza                                             |         | 10 10.8                           | 18 16.8                          | 0.229    |
| Malaise                                            |         | 39 39.0                           | 76 64.4                          | 0.0002   |
| Diarrhoea                                          |         | 26 20.6                           | 41 29.1                          | 0.122    |
| Nausea                                             |         | 26 21.7                           | 43 30.9                          | 0.121    |
| Vomiting                                           |         | 21 16.7                           | 28 20.0                          | 0.529    |
| Ageusia                                            |         | 2 2.2                             | 17 17.9                          | 0.0004   |
| Anosmia                                            |         | 5 5.4                             | 19 19.2                          | 0.004    |
| <b>Laboratory parameters at COVID-19 diagnosis</b> |         |                                   |                                  |          |
| Trombocytes (x 10 <sup>6</sup> / µL)               |         | 243.0 (180.0 - 317.0)             | 190.0 (158.0 - 266.0)            | 0.0011   |
| Leucocytes (x 10 <sup>3</sup> / µL)                |         | 6.1 (4.7 - 8.6)                   | 6.5 (4.5 - 11.2)                 | 0.396    |
| Neutrophil / lymphocyte ratio                      |         | 4.9 (2.7 - 7.9)                   | 4.9 (3.2 - 9.6)                  | 0.534    |
| D-dimers (ng / mL)                                 |         | 1312.0 (676.0 - 2468.0)           | 997.0 (620.5 - 1823.0)           | 0.051    |
| Ferritin (µg / L)                                  |         | 597.0 (277.5 - 1074.0)            | 547.0 (225.0 - 1006.0)           | 0.557    |
| CRP (mg / L)                                       |         | 36.7 (16.5 - 75.9)                | 58.9 (23.2 - 136.2)              | 0.0083   |
| <b>Comorbidities of COVID-19 patients</b>          |         |                                   |                                  |          |
| Anaemia                                            |         | 35 22.2                           | 15 9.9                           | 0.0034   |
| Asthma                                             |         | 13 8.9                            | 12 8.3                           | 1        |
| Cancer                                             |         | 41 26.3                           | 14 9.3                           | 0.0002   |
| Hypertension                                       |         | 91 58.7                           | 69 45.7                          | 0.0295   |
| Dementia                                           |         | 20 13.3                           | 7 4.9                            | 0.0149   |
| Diabetes                                           |         | 42 27.1                           | 46 30.5                          | 0.53     |
| Heart disease                                      |         | 66 43.1                           | 36 24.3                          | 0.0006   |
| Liver disease                                      |         | 10 6.4                            | 4 2.7                            | 0.171    |
| Neuromuscular disease                              |         | 12 8.0                            | 4 2.8                            | 0.0702   |
| Renal disease                                      |         | 43 27.4                           | 16 10.5                          | 0.0002   |

Univariate statistical analysis of continuous data, represented as median (IQR), was performed using unpaired t-test or Mann-Whitney test (depending on normal distribution of data). Univariate statistical analysis of categorical data was done with Fisher's exact test. P < 0.05 was considered as statistically significant. (BMI – body mass index, ICU – intensive care unit, CRP – C-reactive protein)
