# Supplementary material for: Healthcare-Associated COVID-19 across Five Pandemic Waves: Prediction Models and Genomic Analyses
Source: MDPI journal article supplement (doi:10.3390/v14102292), 2022-10-18
Supplement: s1 [file s1]

### Supplementary Table S3

Hospital-acquired infections, according to the ECDC case-source definition

| <b>Case source COVID-19</b>     | <b>Total number<br/>(% of total HAI)</b> | <b>Number sequenced<br/>(% of category)</b> | <b>% belonging to a<br/>genome cluster</b> |
|---------------------------------|------------------------------------------|---------------------------------------------|--------------------------------------------|
| <b><i>Indeterminate HAI</i></b> | 93 (34.6)                                | 36 (38.7)                                   | 70.3                                       |
| <b><i>Probable HAI</i></b>      | 86 (32.0)                                | 40 (46.5)                                   | 87.8                                       |
| <b><i>Definite HAI</i></b>      | 90 (33.5)                                | 47 (52.2)                                   | 90.0                                       |
