# Supplementary material for: Healthcare-Associated COVID-19 across Five Pandemic Waves: Prediction Models and Genomic Analyses
Source: MDPI journal article supplement (doi:10.3390/v14102292), 2022-10-18
Supplement: s1 [file s1]

## Supplementary Table S1

Detailed information on included genomes

| Patient / HCW | GISAIID Accession ID | Sample date | Pangolineage | WHO class | Ward  | HAI or CAI        |
|---------------|----------------------|-------------|--------------|-----------|-------|-------------------|
| 1             | EPI_ISL_3138679      | 2020-03-27  | B.38         | non-VOC   | 1A    | Probable HAI      |
| 2             | EPI_ISL_3138680      | 2020-04-01  | B.1          | non-VOC   | 1B    | Definite HAI      |
| 3             | EPI_ISL_3138681      | 2020-04-02  | B.1          | non-VOC   | 1B    | Indeterminate HAI |
| 4             | EPI_ISL_3138682      | 2020-04-07  | B.38         | non-VOC   | 1A    | Indeterminate HAI |
| 5             | EPI_ISL_3138683      | 2020-04-10  | B.38         | non-VOC   | 1A    | Probable HAI      |
| 6             | EPI_ISL_3138684      | 2020-04-14  | B.38         | non-VOC   | 1B    | Definite HAI      |
| 7             | EPI_ISL_3138685      | 2020-04-14  | B.1          | non-VOC   | 1A    | Indeterminate HAI |
| 8             | EPI_ISL_3138656      | 2020-04-14  | B.1          | non-VOC   | 2A    | Indeterminate HAI |
| 9             | EPI_ISL_3138739      | 2020-04-27  | B.1          | non-VOC   | 2A    | Definite HAI      |
| 10            | EPI_ISL_3138686      | 2020-04-27  | B.1          | non-VOC   | 2A    | Probable HAI      |
| 11            | EPI_ISL_3138734      | 2020-05-01  | B.1.221      | non-VOC   | Other | Healthcare worker |
| 12            | EPI_ISL_3138687      | 2020-05-02  | B.1          | non-VOC   | 2A    | Probable HAI      |
| 13            | EPI_ISL_3138688      | 2020-05-03  | B.1          | non-VOC   | 2A    | Probable HAI      |
| 14            | EPI_ISL_3138689      | 2020-05-04  | B.1          | non-VOC   | 3AB   | Healthcare worker |
| 15            | EPI_ISL_3138690      | 2020-05-05  | B.1          | non-VOC   | 2A    | Healthcare worker |
| 16            | EPI_ISL_3138692      | 2020-05-06  | B.1          | non-VOC   | 3AB   | Definite HAI      |
| 17            | EPI_ISL_3138691      | 2020-05-07  | B.1          | non-VOC   | 3AB   | Healthcare worker |
| 18            | EPI_ISL_3138693      | 2020-05-10  | B.1          | non-VOC   | 3AB   | Definite HAI      |
| 19            | EPI_ISL_3138694      | 2020-05-12  | B.1          | non-VOC   | 3AB   | Probable HAI      |
| 20            | EPI_ISL_3138695      | 2020-05-16  | B.1          | non-VOC   | 3AB   | Healthcare worker |
| 21            | EPI_ISL_3138696      | 2020-05-20  | B.1          | non-VOC   | 3AB   | Healthcare worker |
| 22            | EPI_ISL_3138697      | 2020-05-25  | B.1          | non-VOC   | 2B    | Definite HAI      |
| 23            | EPI_ISL_3138659      | 2020-10-15  | B.1.1.269    | non-VOC   | 2B    | Indeterminate HAI |
| 24            | EPI_ISL_3138733      | 2020-10-20  | B.1.1.44     | non-VOC   | 2B    | Definite HAI      |
| 25            | EPI_ISL_3138660      | 2020-10-20  | B.1.1.44     | non-VOC   | 2C    | Definite HAI      |
| 26            | EPI_ISL_3138737      | 2020-10-21  | B.1.221      | non-VOC   | 2C    | Definite HAI      |
| 27            | EPI_ISL_3138736      | 2020-10-21  | B.1.221      | non-VOC   | 2C    | Definite HAI      |
| 28            | EPI_ISL_3138738      | 2020-10-21  | B.1.1        | non-VOC   | 2B    | Healthcare worker |
| 29            | EPI_ISL_3138661      | 2020-10-21  | B.1.160      | non-VOC   | 2A    | Indeterminate HAI |
| 30            | EPI_ISL_3138735      | 2020-10-21  | B.1.221      | non-VOC   | 2C    | Definite HAI      |
| 31            | EPI_ISL_3138663      | 2020-10-22  | B.1.160      | non-VOC   | 2A    | Healthcare worker |
| 32            | EPI_ISL_3138662      | 2020-10-22  | B.1.160      | non-VOC   | 2A    | Indeterminate HAI |
| 33            | EPI_ISL_3138664      | 2020-10-23  | B.1.221      | non-VOC   | 2D    | Healthcare worker |
| 34            | EPI_ISL_3138665      | 2020-10-25  | B.1.1        | non-VOC   | 2B    | Indeterminate HAI |
| 35            | EPI_ISL_3138667      | 2020-10-25  | B.1.221      | non-VOC   | 2C    | Healthcare worker |
| 36            | EPI_ISL_3138666      | 2020-10-25  | B.1.160      | non-VOC   | 2B    | Definite HAI      |
| 37            | EPI_ISL_3138670      | 2020-10-26  | B.1.177.77   | non-VOC   | 2B    | Healthcare worker |
| 38            | EPI_ISL_3138669      | 2020-10-26  | B.1.1        | non-VOC   | 2B    | Healthcare worker |
| 39            | EPI_ISL_3138671      | 2020-10-27  | B.1.177      | non-VOC   | 2A    | Healthcare worker |
| 40            | EPI_ISL_3138672      | 2020-11-07  | B.1.160      | non-VOC   | 3AB   | Definite HAI      |
| 41            | EPI_ISL_3138673      | 2020-11-08  | B.1.160      | non-VOC   | 3AB   | Definite HAI      |
| 42            | EPI_ISL_3138675      | 2020-11-23  | B.1.177.77   | non-VOC   | 2B    | Definite HAI      |
| 43            | EPI_ISL_3138676      | 2020-12-07  | B.1.177.77   | non-VOC   | 3AB   | Probable HAI      |
| 44            | EPI_ISL_3138677      | 2020-12-08  | B.1.221      | non-VOC   | 5A    | Probable HAI      |

|    |                  |            |            |         |       |                   |
|----|------------------|------------|------------|---------|-------|-------------------|
| 45 | EPI_ISL_3138678  | 2020-12-13 | B.1.177.77 | non-VOC | 2C    | Healthcare worker |
| 46 | EPI_ISL_3138699  | 2021-03-01 | B.1.1.7    | Alpha   | 4A    | Definite HAI      |
| 47 | EPI_ISL_3138698  | 2021-03-01 | B.1.1.7    | Alpha   | 4A    | Probable HAI      |
| 48 | EPI_ISL_3138701  | 2021-03-02 | B.1.1.7    | Alpha   | 4A    | Indeterminate HAI |
| 49 | EPI_ISL_3138702  | 2021-03-03 | B.1.1.7    | Alpha   | 4A    | Probable HAI      |
| 50 | EPI_ISL_3138700  | 2021-03-06 | B.1.1.7    | Alpha   | 4A    | Probable HAI      |
| 51 | EPI_ISL_3138703  | 2021-03-08 | B.1.1.7    | Alpha   | 4A    | Healthcare worker |
| 52 | EPI_ISL_3138706  | 2021-03-09 | B.1.1.7    | Alpha   | 4A    | Definite HAI      |
| 53 | EPI_ISL_3138704  | 2021-03-09 | B.1.1.7    | Alpha   | 4A    | Definite HAI      |
| 54 | EPI_ISL_3138705  | 2021-03-09 | B.1.1.7    | Alpha   | 4A    | Definite HAI      |
| 55 | EPI_ISL_3138707  | 2021-03-14 | B.1.1.7    | Alpha   | 4A    | Indeterminate HAI |
| 56 | EPI_ISL_3138708  | 2021-03-15 | B.1.1.7    | Alpha   | 2A    | Definite HAI      |
| 57 | EPI_ISL_3138709  | 2021-03-16 | B.1.1.7    | Alpha   | 2A    | Indeterminate HAI |
| 58 | EPI_ISL_3138710  | 2021-03-18 | B.1.1.7    | Alpha   | Other | Healthcare worker |
| 59 | EPI_ISL_3138711  | 2021-03-21 | B.1.1.7    | Alpha   | 2A    | Healthcare worker |
| 60 | EPI_ISL_3138712  | 2021-03-22 | B.1.1.7    | Alpha   | 2A    | Healthcare worker |
| 61 | EPI_ISL_3151138  | 2021-03-23 | B.1.1.7    | Alpha   | 1C    | Definite HAI      |
| 62 | EPI_ISL_3138714  | 2021-03-23 | B.1.1.7    | Alpha   | 1C    | Probable HAI      |
| 63 | EPI_ISL_3138713  | 2021-03-23 | B.1.1.7    | Alpha   | 1C    | Probable HAI      |
| 64 | EPI_ISL_3138715  | 2021-03-24 | B.1.1.7    | Alpha   | 1C    | Probable HAI      |
| 65 | EPI_ISL_3138716  | 2021-03-24 | B.1.1.7    | Alpha   | 3AB   | Healthcare worker |
| 66 | EPI_ISL_3138717  | 2021-03-26 | B.1.1.7    | Alpha   | 1C    | Healthcare worker |
| 67 | EPI_ISL_3138718  | 2021-03-26 | B.1.1.7    | Alpha   | 2B    | Definite HAI      |
| 68 | EPI_ISL_3138720  | 2021-03-28 | B.1.1.7    | Alpha   | 2B    | Definite HAI      |
| 69 | EPI_ISL_3138719  | 2021-03-28 | B.1.1.7    | Alpha   | 2B    | Definite HAI      |
| 70 | EPI_ISL_3138721  | 2021-03-29 | B.1.1.7    | Alpha   | 2B    | Healthcare worker |
| 71 | EPI_ISL_3138740  | 2021-03-29 | B.1.1.7    | Alpha   | 2B    | Healthcare worker |
| 72 | EPI_ISL_3138723  | 2021-03-30 | B.1.1.7    | Alpha   | 1C    | Indeterminate HAI |
| 73 | EPI_ISL_3138722  | 2021-03-30 | B.1.1.7    | Alpha   | 3C    | Definite HAI      |
| 74 | EPI_ISL_3138724  | 2021-04-06 | B.1.1.7    | Alpha   | 3C    | Indeterminate HAI |
| 75 | EPI_ISL_3138725  | 2021-04-06 | B.1.1.7    | Alpha   | 3C    | Indeterminate HAI |
| 76 | EPI_ISL_3138726  | 2021-04-17 | B.1.1.7    | Alpha   | 3AB   | Definite HAI      |
| 77 | EPI_ISL_3138729  | 2021-04-18 | B.1.1.7    | Alpha   | 3AB   | Indeterminate HAI |
| 78 | EPI_ISL_3138730  | 2021-04-18 | B.1.1.7    | Alpha   | 3AB   | Probable HAI      |
| 79 | EPI_ISL_3138728  | 2021-04-18 | B.1.1.7    | Alpha   | 3AB   | Indeterminate HAI |
| 80 | EPI_ISL_3138727  | 2021-04-18 | B.1.1.7    | Alpha   | 3AB   | Probable HAI      |
| 81 | EPI_ISL_3138731  | 2021-04-19 | B.1.1.7    | Alpha   | 3AB   | Healthcare worker |
| 82 | EPI_ISL_3138657  | 2021-04-23 | B.1.1.7    | Alpha   | 3AB   | Definite HAI      |
| 83 | EPI_ISL_3138658  | 2021-04-26 | B.1.1.7    | Alpha   | 3AB   | Healthcare worker |
| 84 | EPI_ISL_3138732  | 2021-04-26 | B.1.1.7    | Alpha   | 3AB   | Healthcare worker |
| 85 | EPI_ISL_12589635 | 2021-04-28 | B.1.1.7    | Alpha   | 2B    | Definite HAI      |
| 86 | EPI_ISL_12589636 | 2021-05-06 | B.1.1.7    | Alpha   | 3AB   | Probable HAI      |
| 87 | EPI_ISL_12589637 | 2021-05-06 | B.1.1.7    | Alpha   | 5B    | Probable HAI      |
| 88 | EPI_ISL_12589653 | 2021-05-14 | B.1.1.7    | Alpha   | 5B    | Probable HAI      |
| 89 | EPI_ISL_12589638 | 2021-05-17 | B.1.1.7    | Alpha   | 5D    | Healthcare worker |
| 90 | EPI_ISL_12589639 | 2021-08-09 | AY.5       | Delta   | 6A    | Healthcare worker |
| 91 | EPI_ISL_12589583 | 2021-08-11 | AY.43      | Delta   | 3C    | Indeterminate HAI |
| 92 | EPI_ISL_12589607 | 2021-08-18 | AY.43      | Delta   | ED    | Healthcare worker |

|     |                  |            |           |       |       |                   |
|-----|------------------|------------|-----------|-------|-------|-------------------|
| 93  | EPI_ISL_12589585 | 2021-08-29 | AY.33     | Delta | 1A    | Indeterminate HAI |
| 94  | EPI_ISL_3987574  | 2021-08-30 | AY.33     | Delta | 1A    | Indeterminate HAI |
| 95  | EPI_ISL_12589587 | 2021-09-03 | AY.43     | Delta | 3A    | Healthcare worker |
| 96  | EPI_ISL_12610928 | 2021-09-05 | AY.34     | Delta | 5C    | Healthcare worker |
| 97  | EPI_ISL_4505355  | 2021-09-20 | B.1.617.2 | Delta | 4B    | Definite HAI      |
| 98  | EPI_ISL_12589575 | 2021-10-11 | AY.73     | Delta | 3A    | Healthcare worker |
| 99  | EPI_ISL_12589534 | 2021-10-16 | AY.73     | Delta | 4B    | Definite HAI      |
| 100 | EPI_ISL_12589535 | 2021-10-18 | AY.73     | Delta | 4C    | Probable HAI      |
| 101 | EPI_ISL_5854776  | 2021-10-19 | AY.73     | Delta | 4C    | Healthcare worker |
| 102 | EPI_ISL_5945403  | 2021-10-19 | AY.73     | Delta | 4C    | Probable HAI      |
| 103 | EPI_ISL_12589588 | 2021-10-20 | AY.4.9    | Delta | ED    | Healthcare worker |
| 104 | EPI_ISL_12589584 | 2021-10-21 | AY.43     | Delta | 1C    | Healthcare worker |
| 105 | EPI_ISL_12610925 | 2021-10-24 | AY.126    | Delta | 3C    | Indeterminate HAI |
| 106 | EPI_ISL_12589595 | 2021-10-24 | AY.43     | Delta | ED    | Healthcare worker |
| 107 | EPI_ISL_12589536 | 2021-10-26 | AY.125    | Delta | 4D    | Indeterminate HAI |
| 108 | EPI_ISL_12589550 | 2021-10-28 | AY.43     | Delta | 3C    | Definite HAI      |
| 109 | EPI_ISL_12610923 | 2021-10-29 | AY.43     | Delta | 6C    | Healthcare worker |
| 110 | EPI_ISL_7123504  | 2021-10-31 | AY.43     | Delta | 2A    | Probable HAI      |
| 111 | EPI_ISL_12589551 | 2021-10-31 | AY.98.1   | Delta | 6A    | Healthcare worker |
| 112 | EPI_ISL_12589538 | 2021-11-01 | AY.43     | Delta | 2A    | Probable HAI      |
| 113 | EPI_ISL_12589553 | 2021-11-02 | AY.43     | Delta | 3B    | Healthcare worker |
| 114 | EPI_ISL_12589552 | 2021-11-02 | AY.43     | Delta | 6A    | Probable HAI      |
| 115 | EPI_ISL_12610921 | 2021-11-02 | AY.98.1   | Delta | 6A    | Healthcare worker |
| 116 | EPI_ISL_12610919 | 2021-11-02 | AY.98.1   | Delta | Other | Healthcare worker |
| 117 | EPI_ISL_12589539 | 2021-11-03 | AY.43     | Delta | 3C    | Definite HAI      |
| 118 | EPI_ISL_12610918 | 2021-11-03 | AY.98.1   | Delta | 6A    | Healthcare worker |
| 119 | EPI_ISL_12589596 | 2021-11-03 | AY.98.1   | Delta | 6A    | Healthcare worker |
| 120 | EPI_ISL_12589555 | 2021-11-08 | AY.112    | Delta | 3B    | Healthcare worker |
| 121 | EPI_ISL_12589556 | 2021-11-08 | AY.43     | Delta | 5A    | Indeterminate HAI |
| 122 | EPI_ISL_12589554 | 2021-11-08 | AY.98.1   | Delta | 6A    | Healthcare worker |
| 123 | EPI_ISL_12589557 | 2021-11-10 | AY.4.2    | Delta | 2D    | Healthcare worker |
| 124 | EPI_ISL_12610927 | 2021-11-12 | AY.34     | Delta | 1C    | Probable HAI      |
| 125 | EPI_ISL_12589558 | 2021-11-12 | AY.43     | Delta | ED    | Healthcare worker |
| 126 | EPI_ISL_12589559 | 2021-11-13 | AY.43     | Delta | 2C    | Healthcare worker |
| 127 | EPI_ISL_12589540 | 2021-11-13 | AY.43     | Delta | 2C    | Definite HAI      |
| 128 | EPI_ISL_12589541 | 2021-11-13 | AY.43     | Delta | 2C    | Probable HAI      |
| 129 | EPI_ISL_12610920 | 2021-11-15 | AY.98.1   | Delta | 1C    | Definite HAI      |
| 130 | EPI_ISL_12589597 | 2021-11-15 | AY.9.2    | Delta | 2B    | Healthcare worker |
| 131 | EPI_ISL_12589542 | 2021-11-15 | AY.43     | Delta | 2C    | Definite HAI      |
| 132 | EPI_ISL_12589590 | 2021-11-15 | AY.43     | Delta | 2C    | Definite HAI      |
| 133 | EPI_ISL_12589560 | 2021-11-15 | AY.112    | Delta | 3A    | Healthcare worker |
| 134 | EPI_ISL_12610924 | 2021-11-15 | AY.126    | Delta | 4A    | Healthcare worker |
| 135 | EPI_ISL_12589598 | 2021-11-16 | AY.122    | Delta | 1C    | Healthcare worker |
| 136 | EPI_ISL_12589562 | 2021-11-17 | AY.43     | Delta | 1C    | Healthcare worker |
| 137 | EPI_ISL_12589599 | 2021-11-17 | AY.43     | Delta | 1C    | Healthcare worker |
| 138 | EPI_ISL_12610926 | 2021-11-17 | AY.126    | Delta | 2D    | Healthcare worker |
| 139 | EPI_ISL_12589561 | 2021-11-17 | AY.4.9    | Delta | 3B    | Healthcare worker |
| 140 | EPI_ISL_12589564 | 2021-11-18 | AY.43     | Delta | 2C    | Indeterminate HAI |

|     |                  |            |           |         |       |                   |
|-----|------------------|------------|-----------|---------|-------|-------------------|
| 141 | EPI_ISL_12589563 | 2021-11-18 | AY.43     | Delta   | Other | Healthcare worker |
| 142 | EPI_ISL_12589600 | 2021-11-19 | AY.133    | Delta   | Other | Healthcare worker |
| 143 | EPI_ISL_12610922 | 2021-11-19 | AY.43     | Delta   | ED    | Healthcare worker |
| 144 | EPI_ISL_12589566 | 2021-11-20 | AY.98.1   | Delta   | 1C    | Healthcare worker |
| 145 | EPI_ISL_6706113  | 2021-11-21 | AY.4      | Delta   | 3B    | Healthcare worker |
| 146 | EPI_ISL_12589592 | 2021-11-22 | AY.43     | Delta   | 4B    | Definite HAI      |
| 147 | EPI_ISL_12589591 | 2021-11-22 | AY.43     | Delta   | 4B    | Probable HAI      |
| 148 | EPI_ISL_12589649 | 2021-11-22 | AY.4      | Delta   | 6A    | Healthcare worker |
| 149 | EPI_ISL_12589569 | 2021-11-22 | AY.43     | Delta   | 6B    | Healthcare worker |
| 150 | EPI_ISL_12589565 | 2021-11-22 | AY.4.9    | Delta   | Other | Healthcare worker |
| 151 | EPI_ISL_12589568 | 2021-11-22 | AY.43     | Delta   | Other | Healthcare worker |
| 152 | EPI_ISL_12589570 | 2021-11-23 | AY.92     | Delta   | 6A    | Indeterminate HAI |
| 153 | EPI_ISL_12589593 | 2021-11-24 | AY.43     | Delta   | 2C    | Definite HAI      |
| 154 | EPI_ISL_12589543 | 2021-11-24 | AY.43     | Delta   | 2C    | Definite HAI      |
| 155 | EPI_ISL_12589571 | 2021-11-25 | AY.43     | Delta   | Other | Healthcare worker |
| 156 | EPI_ISL_12589572 | 2021-11-25 | AY.4      | Delta   | Other | Healthcare worker |
| 157 | EPI_ISL_12589574 | 2021-11-26 | AY.127    | Delta   | Other | Healthcare worker |
| 158 | EPI_ISL_12589573 | 2021-11-26 | AY.4      | Delta   | Other | Healthcare worker |
| 159 | EPI_ISL_12589576 | 2021-11-28 | AY.43     | Delta   | 4B    | Healthcare worker |
| 160 | EPI_ISL_12589577 | 2021-11-29 | AY.43     | Delta   | Other | Healthcare worker |
| 161 | EPI_ISL_12589601 | 2021-11-30 | AY.127    | Delta   | Other | Healthcare worker |
| 162 | EPI_ISL_12589578 | 2021-12-01 | AY.113    | Delta   | 3C    | Healthcare worker |
| 163 | EPI_ISL_12589602 | 2021-12-01 | AY.43     | Delta   | 4B    | Healthcare worker |
| 164 | EPI_ISL_12589579 | 2021-12-01 | AY.98.1   | Delta   | Other | Healthcare worker |
| 165 | EPI_ISL_12589580 | 2021-12-02 | AY.4.6    | Delta   | 1A    | Healthcare worker |
| 166 | EPI_ISL_12589605 | 2021-12-02 | B.1.617.2 | Delta   | 4C    | Indeterminate HAI |
| 167 | EPI_ISL_12589581 | 2021-12-03 | AY.43     | Delta   | Other | Healthcare worker |
| 168 | EPI_ISL_12589582 | 2021-12-04 | AY.4      | Delta   | 4A    | Healthcare worker |
| 169 | EPI_ISL_12589603 | 2021-12-05 | AY.4      | Delta   | 1B    | Indeterminate HAI |
| 170 | EPI_ISL_12589544 | 2021-12-19 | AY.43     | Delta   | 4C    | Indeterminate HAI |
| 171 | EPI_ISL_12589645 | 2021-12-21 | BA.1.18   | Omicron | 1A    | Healthcare worker |
| 172 | EPI_ISL_12589545 | 2021-12-21 | AY.92     | Delta   | 4C    | Indeterminate HAI |
| 173 | EPI_ISL_12589546 | 2021-12-22 | AY.43     | Delta   | 3AB   | Definite HAI      |
| 174 | EPI_ISL_9775157  | 2021-12-23 | AY.122    | Delta   | 3C    | Indeterminate HAI |
| 175 | EPI_ISL_12589547 | 2021-12-24 | AY.43     | Delta   | 3AB   | Indeterminate HAI |
| 176 | EPI_ISL_12589644 | 2021-12-24 | BA.1.1    | Omicron | 4C    | Definite HAI      |
| 177 | EPI_ISL_12589604 | 2021-12-26 | B.1.617.2 | Delta   | 6A    | Healthcare worker |
| 178 | EPI_ISL_12589548 | 2021-12-27 | AY.43     | Delta   | 3AB   | Probable HAI      |
| 179 | EPI_ISL_9596724  | 2021-12-27 | AY.43     | Delta   | 3AB   | Definite HAI      |
| 180 | EPI_ISL_12589647 | 2021-12-27 | BA.1.1    | Omicron | Other | Healthcare worker |
| 181 | EPI_ISL_12589549 | 2021-12-29 | AY.43     | Delta   | 3AB   | Probable HAI      |
| 182 | EPI_ISL_12589594 | 2021-12-31 | AY.43     | Delta   | 3AB   | Probable HAI      |
| 183 | EPI_ISL_12589651 | 2021-12-31 | BA.1.18   | Omicron | ED    | Healthcare worker |
| 184 | EPI_ISL_12589640 | 2022-01-04 | AY.98.1   | Delta   | ED    | Healthcare worker |
| 185 | EPI_ISL_8622950  | 2022-01-05 | BA.1.1    | Omicron | 2B    | Healthcare worker |
| 186 | EPI_ISL_12589621 | 2022-01-05 | BA.1.1    | Omicron | ED    | Healthcare worker |
| 187 | EPI_ISL_8799558  | 2022-01-06 | BA.1      | Omicron | 2C    | Probable HAI      |
| 188 | EPI_ISL_12589622 | 2022-01-06 | BA.1.14   | Omicron | 3A    | Healthcare worker |

|     |                  |            |           |         |       |                   |
|-----|------------------|------------|-----------|---------|-------|-------------------|
| 189 | EPI_ISL_12589643 | 2022-01-06 | BA.1.17.2 | Omicron | 3AB   | Definite HAI      |
| 190 | EPI_ISL_12589634 | 2022-01-06 | BA.1.14   | Omicron | 3D    | Healthcare worker |
| 191 | EPI_ISL_12589632 | 2022-01-06 | BA.1.1    | Omicron | ED    | Healthcare worker |
| 192 | EPI_ISL_12589625 | 2022-01-08 | BA.1.17   | Omicron | 3A    | Healthcare worker |
| 193 | EPI_ISL_12589624 | 2022-01-08 | BA.1.1.14 | Omicron | ED    | Healthcare worker |
| 194 | EPI_ISL_8865794  | 2022-01-11 | BA.1.1    | Omicron | 3AB   | Indeterminate HAI |
| 195 | EPI_ISL_12589626 | 2022-01-12 | BA.1.1.14 | Omicron | 1B    | Healthcare worker |
| 196 | EPI_ISL_8865791  | 2022-01-12 | BA.1.1.1  | Omicron | 1B    | Indeterminate HAI |
| 197 | EPI_ISL_12589609 | 2022-01-14 | BA.1.18   | Omicron | 1C    | Healthcare worker |
| 198 | EPI_ISL_12589608 | 2022-01-14 | BA.1.1    | Omicron | 3D    | Healthcare worker |
| 199 | EPI_ISL_12589610 | 2022-01-15 | BA.1.17.2 | Omicron | ED    | Healthcare worker |
| 200 | EPI_ISL_9351882  | 2022-01-16 | BA.1.1    | Omicron | 3C    | Indeterminate HAI |
| 201 | EPI_ISL_9351883  | 2022-01-17 | BA.1.18   | Omicron | 1C    | Probable HAI      |
| 202 | EPI_ISL_12589628 | 2022-01-17 | BA.1.14   | Omicron | 3B    | Healthcare worker |
| 203 | EPI_ISL_12589611 | 2022-01-17 | BA.1.18   | Omicron | 3B    | Healthcare worker |
| 204 | EPI_ISL_9351884  | 2022-01-17 | BA.1.1    | Omicron | 3C    | Probable HAI      |
| 205 | EPI_ISL_9351885  | 2022-01-17 | BA.1.1    | Omicron | 3C    | Indeterminate HAI |
| 206 | EPI_ISL_12589652 | 2022-01-17 | BA.1.1    | Omicron | ED    | Healthcare worker |
| 207 | EPI_ISL_12589648 | 2022-01-18 | BA.1.1    | Omicron | 5B    | Healthcare worker |
| 208 | EPI_ISL_9356641  | 2022-01-20 | BA.1      | Omicron | 3AB   | Definite HAI      |
| 209 | EPI_ISL_12589631 | 2022-01-20 | BA.1.1.1  | Omicron | 3C    | Healthcare worker |
| 210 | EPI_ISL_9356639  | 2022-01-20 | BA.1.1    | Omicron | 3C    | Definite HAI      |
| 211 | EPI_ISL_9356640  | 2022-01-20 | BA.1.1    | Omicron | 3C    | Probable HAI      |
| 212 | EPI_ISL_9356639  | 2022-01-20 | BA.1.1    | Omicron | 4B    | Definite HAI      |
| 213 | EPI_ISL_12589612 | 2022-01-21 | BA.1      | Omicron | 3C    | Healthcare worker |
| 214 | EPI_ISL_12589613 | 2022-01-21 | BA.1.1    | Omicron | 3C    | Healthcare worker |
| 215 | EPI_ISL_12589615 | 2022-01-22 | BA.1.14   | Omicron | 2B    | Healthcare worker |
| 216 | EPI_ISL_12589614 | 2022-01-22 | BA.1.1    | Omicron | 2C    | Healthcare worker |
| 217 | EPI_ISL_12589642 | 2022-01-22 | BA.1.18   | Omicron | 2D    | Healthcare worker |
| 218 | EPI_ISL_9351967  | 2022-01-23 | BA.1.1    | Omicron | 1B    | Healthcare worker |
| 219 | EPI_ISL_12589616 | 2022-01-23 | BA.1.1    | Omicron | 3A    | Healthcare worker |
| 220 | EPI_ISL_9351968  | 2022-01-24 | BA.1.15.1 | Omicron | 1B    | Healthcare worker |
| 221 | EPI_ISL_12589627 | 2022-01-24 | BA.2.10   | Omicron | 3A    | Healthcare worker |
| 222 | EPI_ISL_12589641 | 2022-01-24 | BA.1.1    | Omicron | 6C    | Healthcare worker |
| 223 | EPI_ISL_9500555  | 2022-01-25 | BA.1      | Omicron | 1C    | Healthcare worker |
| 224 | EPI_ISL_9500041  | 2022-01-26 | BA.1.1    | Omicron | 3B    | Healthcare worker |
| 225 | EPI_ISL_9500043  | 2022-01-26 | BA.1.1    | Omicron | Other | Healthcare worker |
| 226 | EPI_ISL_12589618 | 2022-01-27 | BA.1.1    | Omicron | 1B    | Healthcare worker |
| 227 | EPI_ISL_12589617 | 2022-01-27 | BA.1.1    | Omicron | 3C    | Healthcare worker |
| 228 | EPI_ISL_9596646  | 2022-01-27 | BA.1.1    | Omicron | 4A    | Probable HAI      |
| 229 | EPI_ISL_9500419  | 2022-01-27 | BA.1.1    | Omicron | Other | Healthcare worker |
| 230 | EPI_ISL_9596649  | 2022-01-29 | BA.1.1    | Omicron | 2B    | Healthcare worker |
| 231 | EPI_ISL_9596625  | 2022-01-31 | BA.1.1    | Omicron | 3D    | Definite HAI      |
| 232 | EPI_ISL_9596626  | 2022-01-31 | BA.1.14   | Omicron | 3D    | Probable HAI      |
| 233 | EPI_ISL_12589650 | 2022-01-31 | BA.1.15.1 | Omicron | 4C    | Probable HAI      |
| 234 | EPI_ISL_12589619 | 2022-01-31 | BA.1.1.1  | Omicron | ED    | Healthcare worker |
| 235 | EPI_ISL_12589633 | 2022-01-31 | BA.1.1    | Omicron | 6C    | Healthcare worker |
| 236 | EPI_ISL_9596624  | 2022-01-31 | BA.1.1    | Omicron | 1B    | Healthcare worker |

|     |                  |            |           |         |       |                   |
|-----|------------------|------------|-----------|---------|-------|-------------------|
| 237 | EPI_ISL_9596628  | 2022-01-31 | BA.1.1    | Omicron | 6A    | Healthcare worker |
| 238 | EPI_ISL_10334153 | 2022-02-01 | BA.1      | Omicron | 3AB   | Probable HAI      |
| 239 | EPI_ISL_9775113  | 2022-02-01 | BA.1.17   | Omicron | 3AB   | Indeterminate HAI |
| 240 | EPI_ISL_9775115  | 2022-02-01 | BA.1.1    | Omicron | 4B    | Probable HAI      |
| 241 | EPI_ISL_9775110  | 2022-02-01 | BA.1.1.14 | Omicron | Other | Healthcare worker |
| 242 | EPI_ISL_9775113  | 2022-02-01 | BA.2      | Omicron | 6C    | Healthcare worker |
| 243 | EPI_ISL_9775133  | 2022-02-02 | BA.1.1    | Omicron | Other | Healthcare worker |
| 244 | EPI_ISL_9775134  | 2022-02-02 | BA.1.1    | Omicron | 3D    | Healthcare worker |
| 245 | EPI_ISL_9860863  | 2022-02-04 | BA.1.14   | Omicron | 1A    | Indeterminate HAI |
| 246 | EPI_ISL_9860862  | 2022-02-04 | BA.1.18   | Omicron | ED    | Healthcare worker |
| 247 | EPI_ISL_9860876  | 2022-02-07 | BA.1.15.1 | Omicron | 4C    | Probable HAI      |
| 248 | EPI_ISL_9860878  | 2022-02-07 | BA.1.1    | Omicron | 6A    | Healthcare worker |
| 249 | EPI_ISL_10334127 | 2022-02-08 | BA.1.1    | Omicron | 3B    | Healthcare worker |
| 250 | EPI_ISL_10334137 | 2022-02-10 | BA.1.1.1  | Omicron | 2C    | Healthcare worker |
| 251 | EPI_ISL_10334148 | 2022-02-12 | BA.1.1    | Omicron | Other | Healthcare worker |
| 252 | EPI_ISL_10334150 | 2022-02-13 | BA.2      | Omicron | 1B    | Healthcare worker |
| 253 | EPI_ISL_10334155 | 2022-02-15 | BA.1.1    | Omicron | ED    | Healthcare worker |
| 254 | EPI_ISL_12589620 | 2022-02-15 | BA.1.1.1  | Omicron | ED    | Healthcare worker |
| 255 | EPI_ISL_10334161 | 2022-02-15 | BA.1.1    | Omicron | 4B    | Healthcare worker |
| 256 | EPI_ISL_12589606 | 2022-02-16 | BA.2      | Omicron | ED    | Healthcare worker |
| 257 | EPI_ISL_10334158 | 2022-02-16 | BA.2      | Omicron | 1A    | Healthcare worker |
| 258 | EPI_ISL_10590273 | 2022-02-22 | BA.1.1    | Omicron | 4C    | Healthcare worker |
| 259 | EPI_ISL_10590275 | 2022-02-22 | BA.1.1    | Omicron | ED    | Healthcare worker |
| 260 | EPI_ISL_10794399 | 2022-02-24 | BA.1.1    | Omicron | Other | Healthcare worker |
| 261 | EPI_ISL_10794405 | 2022-02-28 | BA.1.1    | Omicron | 1C    | Healthcare worker |
| 262 | EPI_ISL_10843946 | 2022-03-02 | BA.1.1    | Omicron | 3A    | Healthcare worker |
